# Supplementary material
Source: Springer Nature journal article supplement (https://springermedizin.de/resource/supplementary/12885_2008_1530_MOESM1_ESM.pdf/9472248)

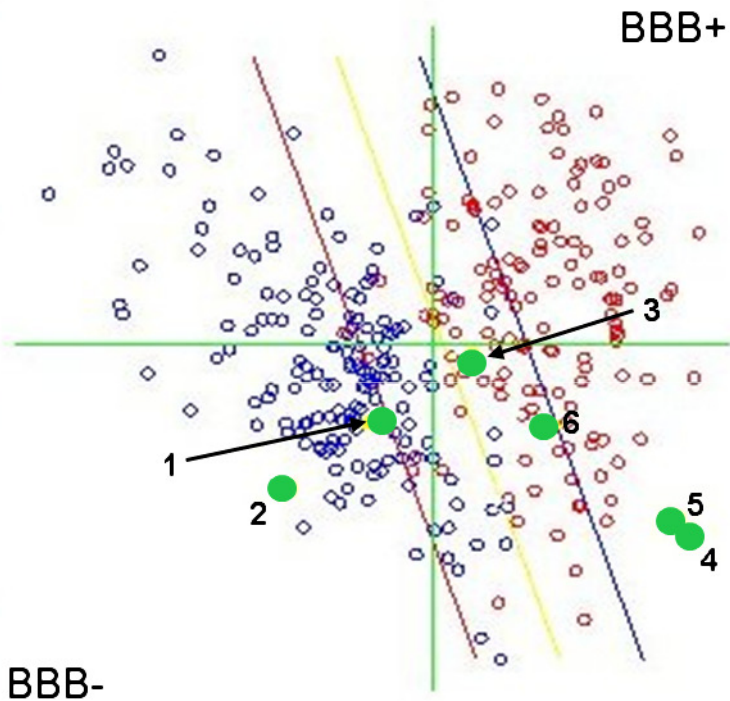

Supplement: MOESM1 [file 9472248]
